# Supplementary material
Source: HighWire-hosted journal article supplement (https://genome.cshlp.org/content/suppl/2004/08/13/14.9.1711)
Supplement: Suzuki_table1.pdf [file Suzuki_table1.pdf]

|                                                  | Human        | Mouse        | Homologous gene pairs |
|--------------------------------------------------|--------------|--------------|-----------------------|
| Number of One-pass sequences                     | 400,225      | 580,209      | 83,708/126,326        |
| Number of used Full-length cDNA libraries        | 137          | 206          | -                     |
| Number of retrieved promoters                    | 8,793 (21.7) | 6,875 (28.4) | 3,324 (25.2/38.0)     |
| Average difference against RefSeq (mRNA level)   | 71.6         | 76           | 63.3/68.8             |
| Average difference against RefSeq (genome level) | 4,396        | 4,027        | 3,998/3,380           |

Supplementary Research Data Table 1
